# Supplementary material
Source: PubMed Central journal article supplement (PMC6609959)
Supplement: DC181964SupplementaryData.pdf [file DC181964SupplementaryData.pdf]

SUPPLEMENTARY DATA

Supplementary Figure S1. Study Population Selection

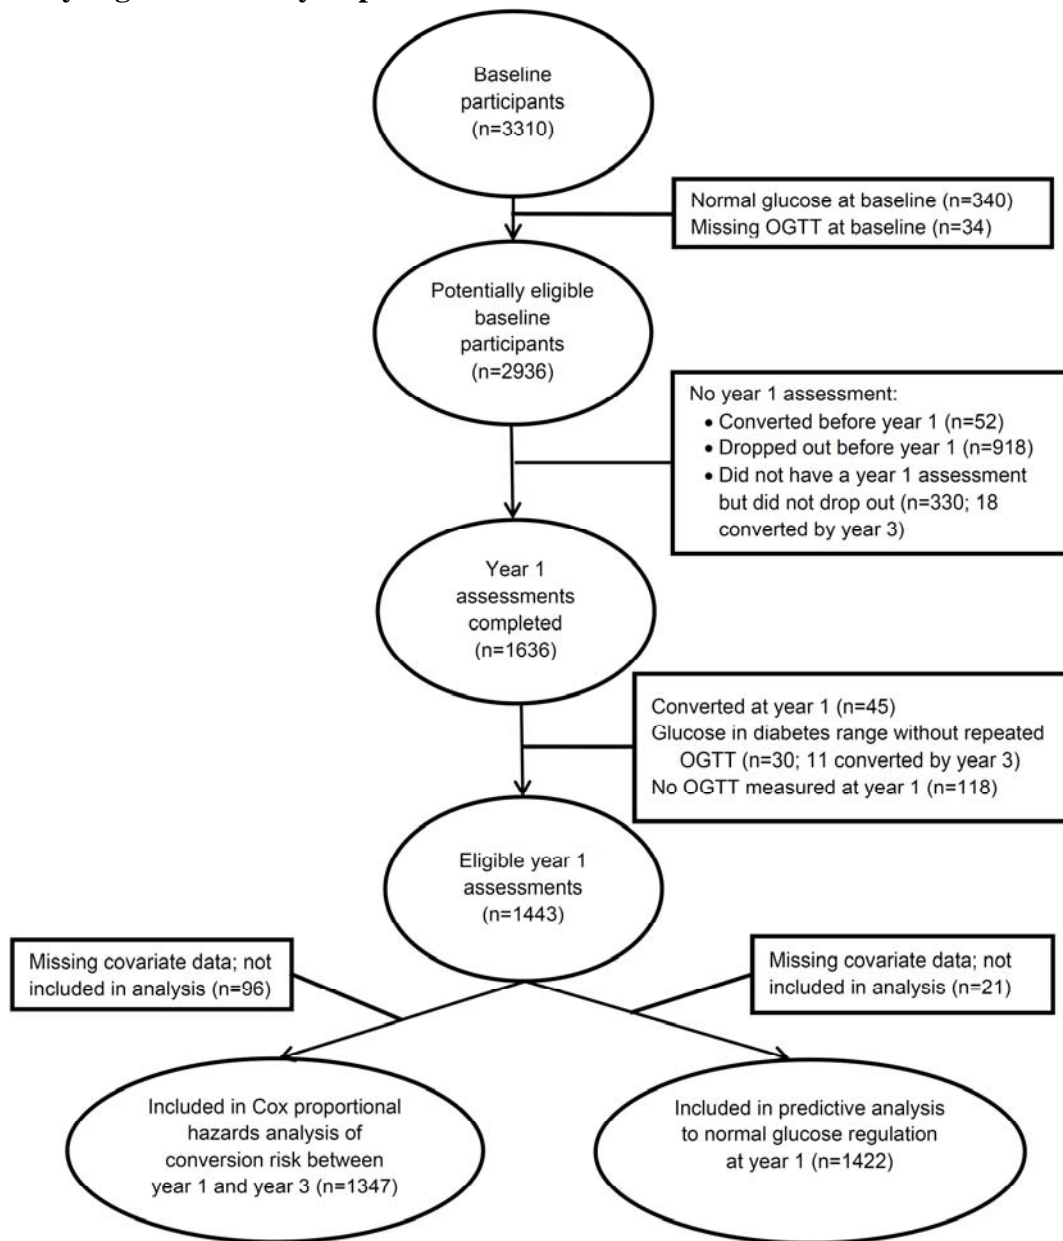

SUPPLEMENTARY DATA

**Supplementary Table 1. Hazard ratios of glucose status at year 1 for diabetes incidence between year 1 and year 3**

| Variable                                                     | Unadjusted<br>(n=1443) | Adding Baseline<br>Covariates<br>(N=1366) | Adding Post-baseline<br>Covariates<br>(N=1347) |
|--------------------------------------------------------------|------------------------|-------------------------------------------|------------------------------------------------|
| <b>Year 1 Glucose Status (Binary)<sup>a</sup></b>            |                        |                                           |                                                |
| Regressed to NGR (Yes/No)                                    | 0.16 (0.07-0.34)***    | 0.20 (0.09-0.47)***                       | 0.28 (0.12-0.67)**                             |
| <b>Year 1 Glucose Status (4 categories)</b>                  |                        |                                           |                                                |
| IFG/IGT <sup>b</sup>                                         | 12.11 (5.29-27.72)***  | 8.09 (3.20-20.44)***                      | 4.72 (1.84-12.07)***                           |
| iIGT <sup>b</sup>                                            | 5.30 (1.68-16.69)*     | 3.95 (1.16-13.44)*                        | 3.26 (0.96-11.12) <sup>£</sup>                 |
| iIFG <sup>b</sup>                                            | 4.59 (2.03-10.41)***   | 4.24 (1.74-10.32)*                        | 3.13 (1.27- 7.31)*                             |
| NGR (Ref)                                                    | 1.00                   | 1.00                                      | 1.00                                           |
| <b>Baseline Covariates<sup>c</sup></b>                       |                        |                                           |                                                |
| Baseline age (per 12.57 years)                               |                        | 1.62 (1.23-2.14)***                       | 1.79 (1.34-2.40)***                            |
| Baseline weight (per 52.57 pounds)                           |                        | 1.36 (1.06-1.73)*                         | 1.44 (1.12-1.85)**                             |
| Baseline log-transformed TG ( per 0.49 mg/dl)                |                        | 1.26 (1.00-1.58)*                         | 1.37 (1.07-1.74)*                              |
| Baseline FBG (per 9.56 mg/dl)                                |                        | 1.11 (0.84-1.47)                          | 1.28 (0.96-1.71)                               |
| Baseline 2-h glucose (per 34.71 mg/dl)                       |                        | 1.32 (1.01-1.73)*                         | 1.55 (1.18-2.04)**                             |
| Baseline hypertension                                        |                        | 0.64 (0.38-1.08)                          | 0.68 (0.40-1.14)                               |
| Family history of diabetes                                   |                        | 2.39 (1.08-5.30)*                         | 2.25 (1.01-5.02)*                              |
| Baseline healthy diet score (per 0.82)                       |                        | 0.74 (0.58-0.94)*                         | 0.78 (0.61-0.98)*                              |
| <b>Post-baseline Covariates<sup>c</sup></b>                  |                        |                                           |                                                |
| Change in weight (per 5.97%) from baseline                   |                        |                                           | 1.84 (1.44-2.36)***                            |
| Change in log-transformed TG (per 0.37 mg/dl) from baseline. |                        |                                           | 1.23 (0.94-1.61)                               |

<sup>a</sup>Hazard ratios when replacing the 4-categorical year 1 glucose status variable by binary year 1 glucose status variable in the following models.

<sup>b</sup>Hazard ratio is compared to NGR at year 1, overall Wald *P* value for the final model (last column) is 0.0138.

<sup>c</sup>Hazard ratios for continuous variables are the hazard ratios per standard deviation (STD).

\* p<0.05, \*\* p< 0.01, \*\*\* p<0.001

<sup>£</sup>p=0.059

NGR = normal glucose regulation, IFG/IGT = both impaired fasting glucose and impaired glucose tolerance, iIGT = isolated impaired glucose tolerance, iIFG = isolated impaired fasting glucose, TG = triglycerides, FBG = fasting blood glucose.

SUPPLEMENTARY DATA

**Supplementary Table 2. Proportion of future diabetes risk (diagnosis between year 1 and year 3) explained by risk factors for diabetes, comparing year 1 glucose status groups**

| Factor explaining future diabetes risk | Glucose Status at Year 1 Compared to NGR |                         |                         |
|----------------------------------------|------------------------------------------|-------------------------|-------------------------|
|                                        | iIFG<br>(n= 601)                         | iIGT<br>(n= 76)         | IFG/IGT<br>(n= 215)     |
| Baseline age (years)                   | 11.4% (4.1%-27.6%)**                     | 6.0% (1.2%-24.3%)*      | 7.1% (2.6%-18.4%)**     |
| Baseline weight (pounds)               | 5.1% (1.1%-20.2%)*                       | 2.2% (0.1%-34.1%)*      | 2.2% (0.2%-19.30%)*     |
| Baseline log-transformed TG (mg/dl)    | <1.0%                                    | 10.6% (5.2%-20.4%****)  | 6.9% (3.7%-12.6%****)   |
| Baseline FBG (mg/dl)                   | 11.7% (3.0%-36.1%)**                     | 0%                      | 8.8% (2.5%-26.7%)**     |
| Baseline 2-h glucose (mg/dl)           | 0%                                       | 27.1% (14.1%-45.9%****) | 16.2% (9.0%-27.6%****)  |
| Family history of diabetes             | 1.7% (0.1%-22.3%)*                       | 8.0% (3.1%-19.3%****)   | 2.1% (0.3%-12.9%)*      |
| Baseline healthy diet score            | 0%                                       | 0%                      | 0%                      |
| Change in weight (%)                   | 20.6% (8.7%-41.5%****)                   | 11.7% (3.4%-33.6%)**    | 20.1% (10.6%-34.8%****) |

Analyses were conducted on the final Cox proportional hazard model using the SAS macro %mediate. Each variable was estimated while controlling for the rest of the covariates: age, baseline weight, baseline TG, baseline FBG and 2-h glucose, family history of diabetes, baseline healthy diet score, baseline hypertension, change in weight, change in TG.

\*p>0.05-0.10, \*\* p<0.05, \*\*\* p< 0.01, \*\*\*\* p<0.001 SAS %mediate documentation indicates that the p-value is a more accurate measurement of significance than the confidence interval.

NGR = normal glucose regulation, iIFG = isolated impaired fasting glucose, iIGT = isolated impaired glucose tolerance, IFG/IGT = both impaired fasting glucose and impaired glucose tolerance, TG = triglycerides, FBG = fasting blood glucose.
